# Supplementary material for: Influence of clinical and neurocognitive factors in psychosocial functioning after a first episode non-affective psychosis: differences between males and females
Source: Frontiers journal article supplement (doi:10.3389/fpsyt.2022.982583), 2022-10-20

**Supplementary Figure 1.** Flowchart for the selection of the 247 non-affective FEP at baseline

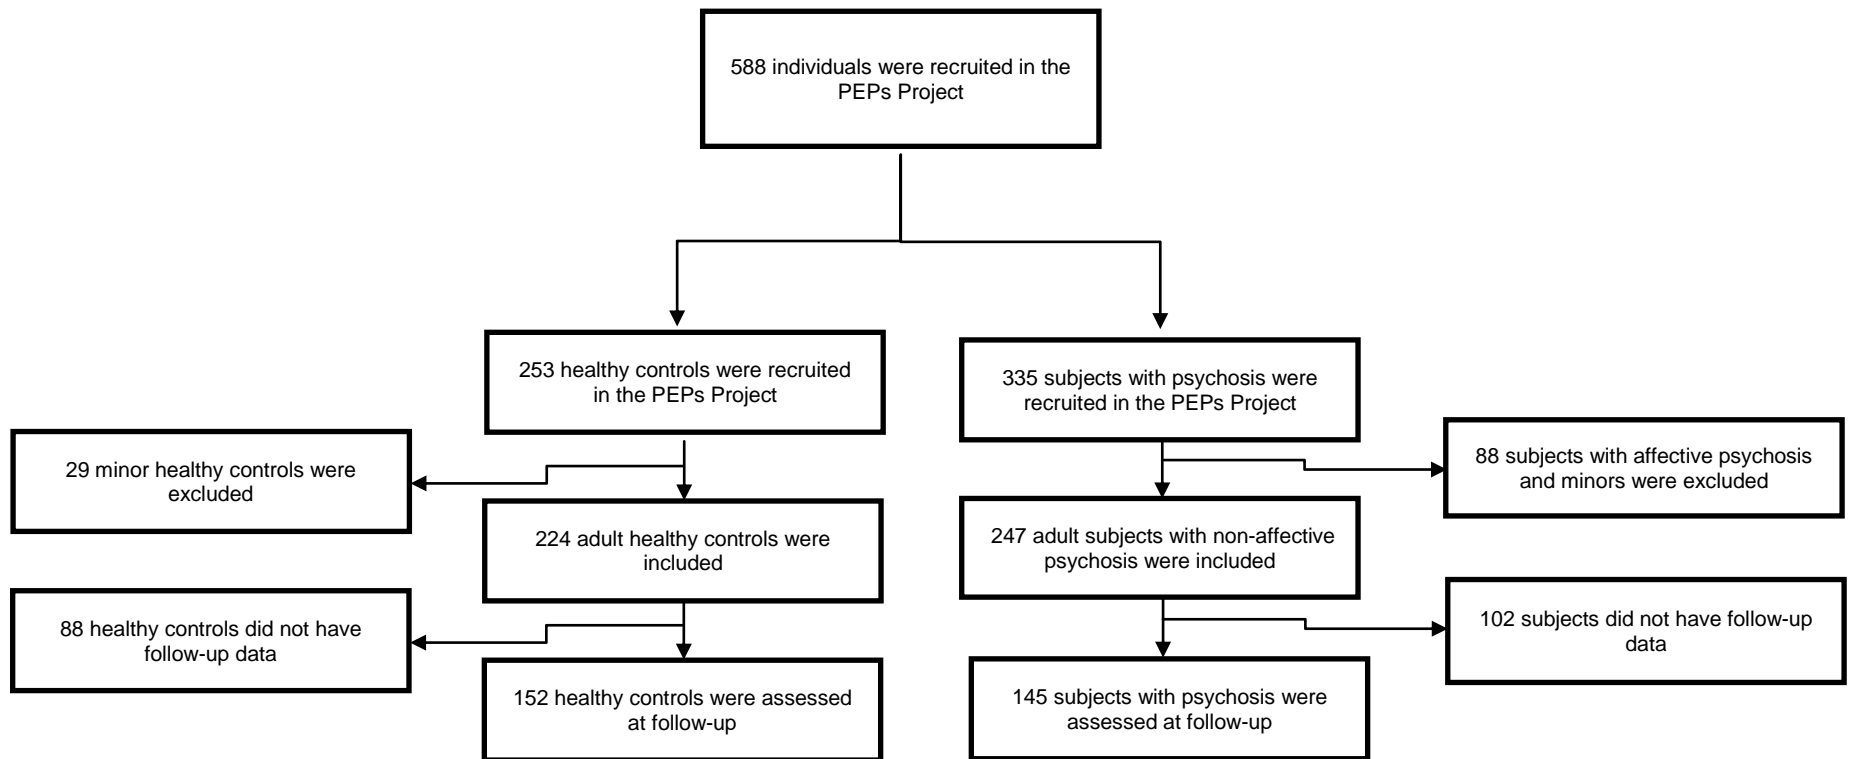

Supplement: Data_Sheet_1.PDF [file Data_Sheet_1.PDF]
